# Supplementary material for: Antiadipogenic Effects of Mixtures of Cornus officinalis and Ribes fasciculatum Extracts on 3T3-L1 Preadipocytes and High-Fat Diet-Induced Mice
Source: MDPI journal article supplement (doi:10.3390/molecules25102350), 2020-05-18
Supplement: s1 [file s1]

## Supplementary Materials

### Antiadipogenic Effects of Mixtures of *Cornus officinalis* and *Ribes fasciculatum* Extracts on 3T3-L1 Preadipocytes and High-Fat Diet-Induced Mice

Eunkuk Park <sup>1,2,†</sup>, Chang Gun Lee <sup>1,2</sup>, Hyesoo Jeong <sup>3</sup>, Subin Yeo <sup>3</sup>, Ji Ae Kim <sup>3</sup> and Seon-Yong Jeong <sup>1,2,\*</sup>

<sup>1</sup> Department of Medical Genetics, Ajou University School of Medicine, Suwon 16499, Republic of Korea; jude0815@hotmail.com (E.P.); dangsunsang@naver.com (C.G.L.)

<sup>2</sup> Department of Biomedical Sciences, Ajou University Graduate School of Medicine, Suwon 16499, Republic of Korea

<sup>3</sup> Nine B Company, Daejeon 34121, Republic of Korea; jhyesoo921@gmail.com (H.J.), snsans@naver.com (S.Y.), ji.ae.kim@daum.net (J.A.K.)

\* Correspondence: jeongsy@ajou.ac.kr; Tel.: +82-31-219-4520; Fax: +82-31-219-4521

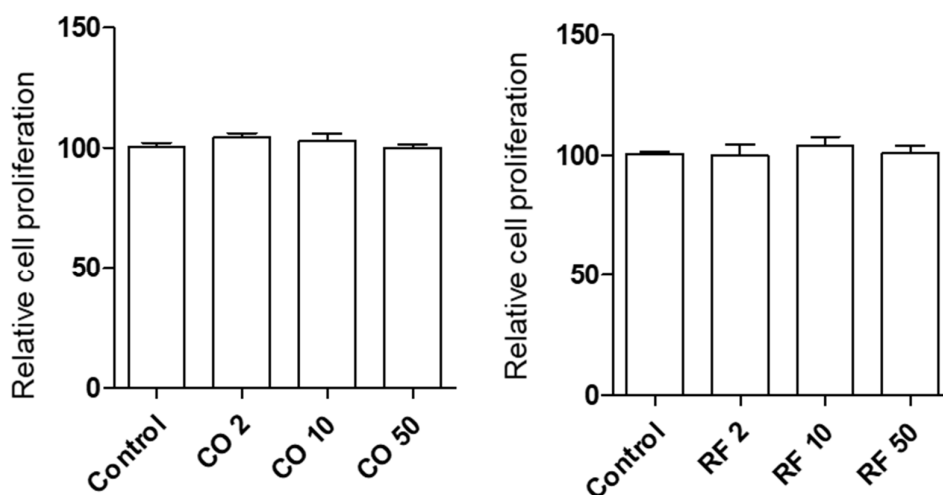

**Figure S1.** Effect of *Cornus officinalis* (CO) or *Ribes fasciculatum* (RF) on cell viability in 3T3-L1 cells. Cells were treated with CO or RF for 48 h and cell viability was assessed by WST assay.

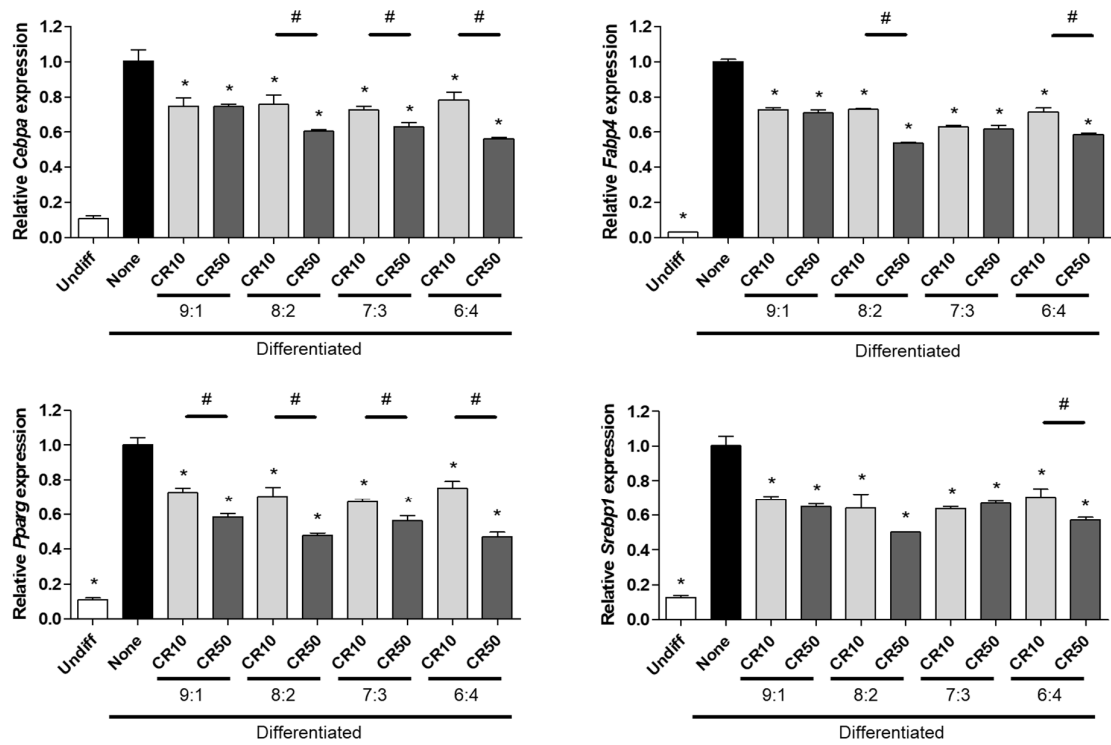

**Figure S2.** Anti-adipogenic effect of combined treatment with CO and RF in preadipocyte. 3T3-L1 cells were treated with several conditions of CO and RF mixture (10 and 50 µg/ml). Adipogenesis-associated genes (*Cebpa*, *Fabp4*, *Pparg* and *Srebp1*) were evaluated by qRT-PCR. The relative mRNA expressions were normalized by mouse *Gapdh*. \*  $p < 0.05$  vs. none, #  $p < 0.05$  vs. CR10 (Tukey's honest significant difference post hoc test, analysis of variance). Abbreviations: Undiff, undifferentiated; None, non-treated.
